# Supplementary material for: Response of Cytoprotective and Detoxifying Proteins to Vanadate and/or Magnesium in the Rat Liver: The Nrf2‐Keap1 System
Source: Hindawi journal article supplement (doi:10.1155/2021/8447456), 2021-01-01

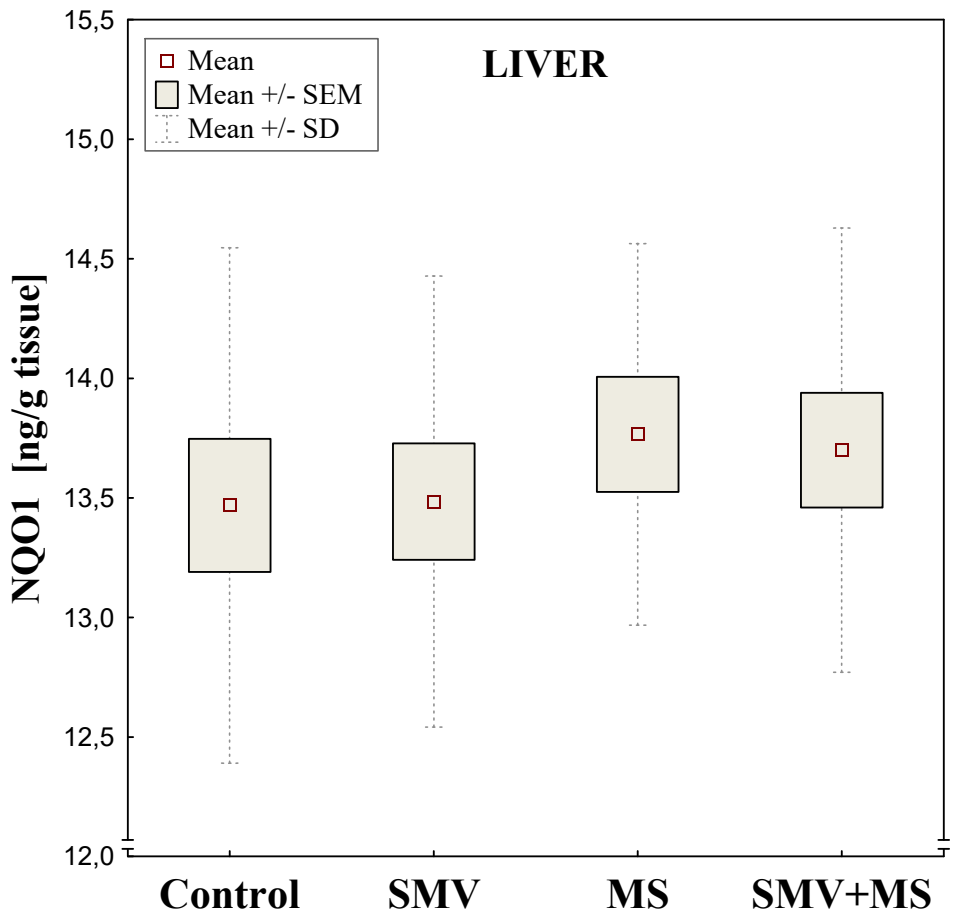

Supplement: f5 [file 8447456.f5.pdf]
